# Supplementary material for: Validating Reference Gene Expression Stability in Human Ovarian Follicles, Oocytes, Cumulus Cells, Ovarian Medulla, and Ovarian Cortex Tissue
Source: MDPI journal article supplement (doi:10.3390/ijms23020886), 2022-01-14
Supplement: s1 [file s1]

**Table S1.** Type of sample collected from each patient included in the study

| Patient | Sample type           |                     |                        |                  |                   |                  |
|---------|-----------------------|---------------------|------------------------|------------------|-------------------|------------------|
|         | Oocytes<br>(GV-Fresh) | Oocytes<br>(GV-IVM) | Preantral<br>follicles | Cumulus<br>cells | Medulla<br>tissue | Cortex<br>tissue |
| 1       | *                     |                     |                        |                  |                   |                  |
| 2       | *                     |                     | *                      |                  |                   |                  |
| 3       | *                     |                     | *                      |                  |                   |                  |
| 4       | *                     |                     | *                      | *                |                   |                  |
| 5       |                       |                     | *                      |                  |                   |                  |
| 6       | *                     |                     |                        | *                |                   |                  |
| 7       |                       |                     | *                      |                  | *                 |                  |
| 8       | *                     |                     |                        |                  | *                 |                  |
| 9       |                       |                     | *                      |                  | *                 |                  |
| 10      | *                     |                     | *                      | *                | *                 |                  |
| 11      |                       | *                   |                        |                  |                   |                  |
| 12      |                       | *                   |                        |                  |                   |                  |
| 13      |                       | *                   |                        |                  |                   |                  |
| 14      |                       | *                   |                        |                  |                   |                  |
| 15      |                       | *                   |                        |                  |                   |                  |
| 16      |                       | *                   |                        |                  |                   |                  |
| 17      |                       | *                   |                        |                  |                   |                  |
| 18      |                       | *                   |                        |                  |                   |                  |
| 19      |                       | *                   |                        |                  |                   |                  |
| 20      |                       | *                   |                        |                  |                   |                  |
| 21      |                       | *                   |                        |                  |                   |                  |
| 22      |                       | *                   |                        |                  |                   |                  |
| 23      |                       | *                   |                        |                  |                   |                  |
| 24      |                       | *                   |                        |                  |                   |                  |
| 25      |                       | *                   |                        |                  |                   |                  |
| 26      |                       |                     |                        |                  |                   | *                |
| 27      |                       |                     |                        |                  |                   | *                |
| 28      |                       |                     |                        |                  |                   | *                |
| 29      |                       |                     |                        |                  |                   | *                |

GV-Fresh, non-cultured immature oocytes collected at the germinal vesicle stage. GV-IVM, oocytes that remained at the GV stage after in vitro maturation (IVM). Preantral follicles were around 60  $\mu$ m in diameter.
